# Supplementary material
Source: ML conference proceedings conference paper supplement (https://proceedings.mlr.press/v70/pritzel17a.html)
Supplement: Supplementary file [file pritzel17a-supp.pdf]

---

## Supplementary Material for Neural Episodic Control

---

Alexander Pritzel<sup>1</sup> Benigno Uria<sup>1</sup> Sriram Srinivasan<sup>1</sup> Adrià Puigdomènech Badia<sup>1</sup> Oriol Vinyals<sup>1</sup>  
Demis Hassabis<sup>1</sup> Daan Wierstra<sup>1</sup> Charles Blundell<sup>1</sup>

### Sensitivity of NEC to Hyperparameters

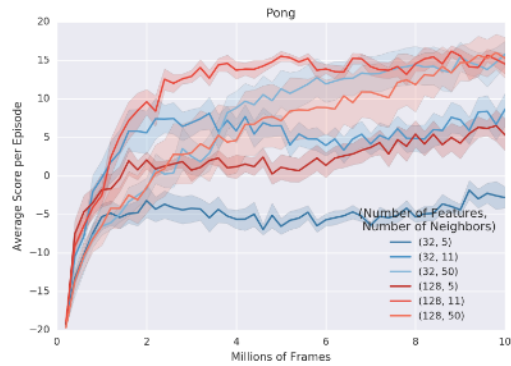

Figure 1. Effect of Number of Neighbors and Number of Features on Pong.

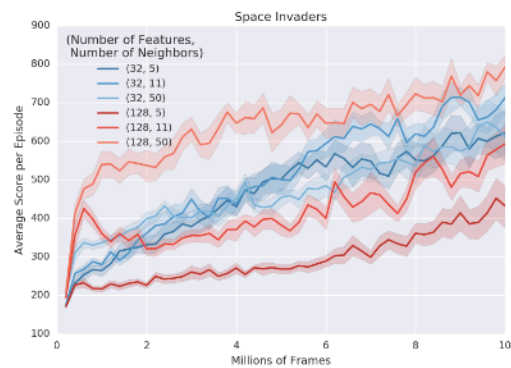

Figure 2. Effect of Number of Neighbors and Number of Features on Space Invaders.

Figures 1 and 2 show results obtained when varying the number of neighbours and the size of the DND keys. We can observe that large key sizes benefit from the use of more neighbours.

### Scores

Neural Episodic Control

|                     | A3C      | Nature DQN    | MFEC           | NEC            | Prioritised Replay | Q*( $\lambda$ ) | Retrace( $\lambda$ ) |
|---------------------|----------|---------------|----------------|----------------|--------------------|-----------------|----------------------|
| Alien               | 415.5    | 634.8         | 1717.7         | <b>3460.6</b>  | 800.5              | 476.8           | 541.2                |
| Amidar              | 96.3     | 126.8         | 370.9          | <b>811.3</b>   | 99.1               | 134.5           | 162.9                |
| Assault             | 720.8    | <b>1489.5</b> | 510.2          | 599.9          | 1339.9             | 1026.6          | 1331.1               |
| Asterix             | 301.6    | <b>2989.1</b> | 1776.6         | 2480.4         | 2599.7             | 2588.6          | 2520.3               |
| Asteroids           | 1360.1   | 395.3         | <b>4706.8</b>  | 2496.1         | 854.0              | 569.8           | 579.2                |
| Atlantis            | 36383    | 14210.5       | <b>95499.4</b> | 51208.0        | 12579.1            | 28818.8         | 44771.1              |
| Bank Heist          | 15.8     | 29.3          | 163.7          | <b>343.3</b>   | 70.1               | 32.8            | 26.3                 |
| Battlezone          | 2354.2   | 6961.0        | <b>19053.6</b> | 13345.5        | 13500.0            | 8227.2          | 6762.2               |
| Beamrider           | 450.2    | <b>3741.7</b> | 858.8          | 749.6          | 3249.6             | 656.2           | 725.4                |
| Berzerk             | 593.6    | 484.2         | <b>924.2</b>   | 852.8          | 575.6              | 647.9           | 701.5                |
| Bowling             | 25       | 35.0          | 51.8           | <b>71.8</b>    | 30.0               | 28.4            | 39.9                 |
| Boxing              | 2.5      | 31.3          | 10.7           | <b>72.8</b>    | 64.7               | 22.3            | 30.7                 |
| Breakout            | 1.5      | 36.8          | <b>86.2</b>    | 13.6           | 17.7               | 6.3             | 10.2                 |
| Centipede           | 3228     | 4401.4        | <b>20608.8</b> | 12314.5        | 4694.1             | 4097.5          | 4792.9               |
| Chopper Command     | 1036.7   | 827.2         | 3075.6         | <b>5070.3</b>  | 1426.5             | 760.6           | 801.6                |
| Crazy Climber       | 70103.5  | 66061.6       | 9892.2         | 34344.0        | <b>76574.1</b>     | 64980.6         | 54177.6              |
| Defender            | 4596     | 2877.9        | <b>10052.8</b> | 6126.1         | 3486.4             | 3260.8          | 3275.6               |
| Demon Attack        | 346.8    | 5541.9        | 1081.8         | 641.4          | <b>6503.6</b>      | 4914.8          | 4836.6               |
| Double Dunk         | -17.2    | -19.0         | -13.2          | <b>1.8</b>     | -15.9              | -18.2           | -18.3                |
| Enduro              | 0        | 364.9         | 0.0            | 1.4            | <b>1125.8</b>      | 396.0           | 440.6                |
| Fishing Derby       | -89.5    | -81.6         | -90.3          | -72.2          | <b>-48.2</b>       | -84.2           | -79.8                |
| Freeway             | 0        | 21.5          | 0.6            | 13.5           | 18.6               | <b>22.2</b>     | 17.1                 |
| Frostbite           | 218.9    | 339.1         | 925.1          | <b>2747.4</b>  | 711.3              | 407.2           | 325.0                |
| Gopher              | 854.1    | 1111.2        | <b>4412.6</b>  | 2432.3         | 1235.3             | 2292.4          | 3050.4               |
| Gravitar            | 215.8    | 154.7         | 1011.3         | <b>1257.0</b>  | 218.9              | 121.9           | 108.9                |
| H.E.R.O.            | 4598.2   | 1050.7        | 14767.7        | <b>16265.3</b> | 5164.5             | 2223.3          | 3298.2               |
| Ice Hockey          | -8.1     | -4.5          | -6.5           | <b>-1.6</b>    | -10.2              | -11.1           | -9.1                 |
| James Bond          | 31.5     | 165.9         | 244.7          | <b>376.8</b>   | 203.8              | 64.5            | 67.2                 |
| Kangaroo            | 55.2     | 519.6         | 2465.7         | <b>2489.1</b>  | 616.7              | 520.7           | 554.6                |
| Krull               | 3627.6   | 6015.1        | 4555.2         | 5179.2         | 6700.7             | <b>8169.8</b>   | 7399.3               |
| Kung Fu Master      | 6634.6   | 17166.1       | 12906.5        | <b>30568.1</b> | 21456.2            | 13874.7         | 18065.8              |
| Montezuma's Revenge | 0.1      | 0.0           | <b>76.4</b>    | 42.1           | 0.0                | 0.4             | 2.6                  |
| Ms. Pac-Man         | 770      | 1657.0        | 3802.7         | <b>4142.8</b>  | 1558.3             | 1289.9          | 1401.6               |
| Name This Game      | 2745.1   | 6380.2        | 4845.1         | 5532.0         | <b>7525.0</b>      | 5378.5          | 5227.8               |
| Phoenix             | 2542.5   | 5357.0        | 5334.5         | 5756.5         | <b>11813.3</b>     | 5771.2          | 6046.7               |
| Pitfall!            | -43.9    | <b>0.0</b>    | -79.0          | 0.0            | 0.0                | -4.4            | -1.5                 |
| Pong                | -20.3    | -3.2          | -20.0          | <b>20.4</b>    | 6.6                | -18.9           | -13.3                |
| Private Eye         | 86.3     | 100.0         | <b>3963.8</b>  | 162.2          | 100.0              | 1230.4          | 80.2                 |
| Q*bert              | 438.9    | 2372.5        | <b>12500.4</b> | 7419.2         | 839.0              | 1812.4          | 2582.1               |
| River Raid          | 2312.6   | 3144.9        | 4195.0         | <b>5498.1</b>  | 4871.8             | 2787.1          | 2671.0               |
| Road Runner         | 759.9    | 7285.4        | 5432.1         | 12661.4        | <b>24746.6</b>     | 3133.1          | 6285.0               |
| Robot Tank          | 2.4      | <b>14.6</b>   | 7.3            | 11.1           | 8.5                | 10.1            | 9.1                  |
| Seaquest            | 514.1    | 618.7         | 711.6          | 1015.3         | <b>1192.2</b>      | 611.7           | 574.3                |
| Skiing              | -20002.7 | -19818.0      | -15278.9       | -26340.7       | <b>-12762.4</b>    | -17055.7        | -13880.4             |
| Solaris             | 2932.7   | 1343.0        | <b>8717.5</b>  | 7201.0         | 1397.1             | 2460.0          | 3211.8               |
| Space Invaders      | 201      | 642.2         | <b>2027.8</b>  | 1016.0         | 673.0              | 545.6           | 527.9                |
| Stargunner          | 613.6    | 604.8         | <b>14843.9</b> | 1171.4         | 1131.4             | 877.0           | 886.7                |
| Surround            | -9.9     | -9.7          | -9.9           | <b>-7.9</b>    | -8.5               | -9.8            | -9.9                 |
| Tennis              | -23.8    | <b>0.0</b>    | -23.7          | -1.8           | 0.0                | -4.3            | 0.0                  |
| Time Pilot          | 3683.5   | 1952.0        | <b>10751.3</b> | 10282.7        | 2430.2             | 2323.7          | 2576.0               |
| Tutankham           | 108.3    | 148.7         | 86.3           | 121.6          | <b>194.0</b>       | 108.3           | 122.4                |
| Up'n Down           | 3322.3   | 18964.9       | 22320.8        | <b>39823.3</b> | 11856.2            | 11961.2         | 13308.4              |
| Venture             | 0        | 3.8           | 0.0            | 0.0            | 0.0                | 21.5            | <b>75.6</b>          |
| Video Pinball       | 30548.5  | 14316.0       | <b>90507.7</b> | 22842.6        | 24254.5            | 11507.3         | 14178.9              |
| Wizard of Wor       | 876      | 401.4         | <b>12803.1</b> | 8480.7         | 1146.6             | 526.8           | 420.4                |
| Yars' Revenge       | 9953     | 7614.1        | 5956.7         | <b>21490.5</b> | 9228.5             | 8884.4          | 8532.7               |
| Zaxxon              | 39.7     | 200.3         | 6288.1         | <b>10082.4</b> | 3123.5             | 278.3           | 168.3                |

Table 1. Scores at 10 Million Frames
